# Supplementary material for: Dietary intake of heme iron is associated with ferritin and hemoglobin levels in Dutch blood donors: results from Donor InSight
Source: PubMed Central journal article supplement — Haematologica. 2019 Nov 14;105(10):2400–6. doi: 10.3324/haematol.2019.229450 (PMC7556674; doi:10.3324/haematol.2019.229450), 2019-11-14
Supplement: 2019_229450-DisclosuresContributions.pdf [file 2019_229450-DisclosuresContributions.pdf]

Haematologica  
HAEMATOL/2019/229450  
Version 3

Dietary intake of heme iron is associated with ferritin and hemoglobin levels in Dutch blood donors: results from Donor InSight

Tiffany C. Timmer, Rosa de Groot, Judith J.M. Rijnhart, Jeroen Lakerveld, Johannes Brug, Corine W.M. Perenboom, A. Mireille Baart, Femmeke J. Prinsze, Saurabh Zalpuri, C. Ellen van der Schoot, Wim L.A.M. de Kort, and Katja van den Hurk

Disclosures: Conflict-of-interest disclosure: The authors declare no competing financial interests.

Contributions: K.v.d.H. and W.L.A.M.d.K. designed the project. T.C.T. and R.d.G. developed the theory. T.C.T. took the lead in writing the manuscript, performed the analyses and made the tables and figures. J.J.M.R. verified the analytical methods. K.v.d.H. supervised the findings of this work. All authors contributed to the interpretation of the results, provided critical feedback and helped shape the research, analyses and manuscript.
